# Supplementary material
Source: HighWire-hosted journal article supplement (https://jcp.bmj.com/content/jclinpath-2017-204978)
Supplement: inline-supplementary-material-1 [file inline-supplementary-material-1.pdf]

|                   | Nanodrop                                       | Qubit                                          |
|-------------------|------------------------------------------------|------------------------------------------------|
| concentration DNA | Median (Min - Max)[ng/μl]<br>78,68 (23,1 –206) | Median (Min - Max)[ng/μl]<br>33,72 (2,44-93,6) |
| A260/A280 DNA     | 1,77 (1,82 –2,11)                              | NA                                             |
| A260/A230 DNA     | 2,88 (1,95 –5,72)                              | NA                                             |

**Supplementary table 1:** Comparison of DNA concentration after isolation from peripheral blood  
(NA - not available)
