# Supplementary material
Source: HighWire-hosted journal article supplement (https://jcp.bmj.com/content/jclinpath-2017-204978)
Supplement: inline-supplementary-material-2 [file inline-supplementary-material-2.pdf]

| <b>Gene</b>  | <b>Coordinates in genome<br/>(chromosome: start – stop,<br/><u>according to</u> NCBI)</b> | <b>GenBank/DDBJ/EMBL<br/>Accession numbers</b> |
|--------------|-------------------------------------------------------------------------------------------|------------------------------------------------|
| <i>APOA1</i> | chr11:116835751 - 116837622                                                               | NG_012021.1                                    |
| <i>APOA2</i> | chr1:161222293 - 61223628                                                                 | NG_012043.1                                    |
| <i>APP</i>   | chr21:25880550 - 26171128                                                                 | NG_007376.1                                    |
| <i>B2M</i>   | chr15:44711487 - 44718159                                                                 | NG_012920.1                                    |
| <i>CST3</i>  | chr20:23627897 - 23638048                                                                 | NG_012887.2                                    |
| <i>FGA</i>   | chr4:154583128 - 154590745                                                                | NG_008832.1                                    |
| <i>GSN</i>   | chr9:121268102 - 121332844                                                                | NG_012872.1                                    |
| <i>ITM2B</i> | chr13:48233138 - 48262096                                                                 | NG_013069.1                                    |
| <i>LYZ</i>   | chr12:69348354 - 69354233                                                                 | NG_008195.1                                    |
| <i>PRNP</i>  | chr20:4686151 - 4701588                                                                   | NG_009087.1                                    |
| <i>TTR</i>   | chr18:31591767 - 31599024                                                                 | NG_009490.1                                    |

**Supplementary table 2:** List of genes included in the design together with their genomic coordinates and gene accession numbers
