# Supplementary material
Source: HighWire-hosted journal article supplement (https://jcp.bmj.com/content/jclinpath-2017-204978)
Supplement: inline-supplementary-material-5 [file inline-supplementary-material-5.pdf]

| Patient ID | PRNP              | PRNP              | PRNP                  | FGA                |
|------------|-------------------|-------------------|-----------------------|--------------------|
|            | g[20:4699605_A>G] | g[20:4699380_G>A] | g[del(20:4699443_469! | g[4:154586438_T>C] |
| 3_SD       | HET               | 0                 | 0                     | HET                |
| 29_KZ      | 0                 | 0                 | 0                     | HET                |
| 33_KK      | 0                 | 0                 | 0                     | HET                |
| 26_PM      | 0                 | 0                 | 0                     | 0                  |
| 5_TD       | 0                 | 0                 | 0                     | 0                  |
| 7_PL       | 0                 | 0                 | 0                     | 0                  |
| 26_UK      | 0                 | 0                 | 0                     | 0                  |
| 34_HM      | 0                 | 0                 | 0                     | HOM                |
| 14_RJ      | HET               | 0                 | 0                     | HET                |
| 27_HJ      | HET               | 0                 | 0                     | 0                  |
| 28_UJ      | HET               | 0                 | 0                     | 0                  |
| 15_SL      | HET               | 0                 | 0                     | HOM                |
| 2_PA       | 0                 | 0                 | 0                     | 0                  |
| 22_VA      | 0                 | HET               | 0                     | 0                  |
| 18_PJ      | 0                 | 0                 | 0                     | 0                  |
| 17_KM      | 0                 | 0                 | 0                     | 0                  |
| 42_KF      | HET               | 0                 | 0                     | 0                  |
| 20_KR      | 0                 | 0                 | 0                     | 0                  |
| 32_S       | 0                 | 0                 | 0                     | 0                  |
| 21_O       | 0                 | 0                 | 0                     | 0                  |
| 24_RA      | 0                 | 0                 | 0                     | 0                  |
| 10_LM      | HOM               | 0                 | 0                     | 0                  |
| 41_KZ      | HOM               | 0                 | 0                     | HET                |
| 30_CHA     | 0                 | 0                 | 0                     | HET                |
| 13_SG      | HET               | 0                 | 0                     | 0                  |
| 6_SJ       | HET               | 0                 | 0                     | 0                  |
| 19_WF      | 0                 | 0                 | 0                     | HET                |
| 4_PD       | HET               | 0                 | 0                     | 0                  |
| 8_SM       | HET               | 0                 | 0                     | 0                  |
| 1_MJ       | HOM               | 0                 | 0                     | 0                  |
| 11_KH      | HET               | 0                 | 0                     | 0                  |
| 12_SM      | HOM               | 0                 | 0                     | 0                  |
| 3_BI       | HOM               | 0                 | 0                     | HET                |
| 31_CHM     | HET               | 0                 | 0                     | HET                |
| 23_HJ      | 0                 | 0                 | 0                     | HET                |
| 43_CHM     | 0                 | 0                 | HET                   | HET                |
| 25_KF      | 0                 | 0                 | 0                     | HET                |
| 40_DA      | 0                 | 0                 | 0                     | 0                  |
| 35_GP      | 0                 | 0                 | 0                     | 0                  |
| 16_KV      | 0                 | 0                 | 0                     | 0                  |
|            | <b>16</b>         | <b>1</b>          | <b>1</b>              | <b>14</b>          |

| CST3               | TTR                | TTR                | GSN                |
|--------------------|--------------------|--------------------|--------------------|
| g[20:23637790_C>T] | g[18:31593070_G>A] | g[18:31592902_G>A] | g[9:121326630_C>G] |
| HET                | 0                  | HET                | 0                  |
| HOM                | 0                  | 0                  | 0                  |
| HET                | 0                  | 0                  | 0                  |
| 0                  | 0                  | 0                  | 0                  |
| 0                  | 0                  | 0                  | 0                  |
| 0                  | 0                  | 0                  | 0                  |
| 0                  | HET                | 0                  | 0                  |
| 0                  | 0                  | 0                  | 0                  |
| HOM                | 0                  | 0                  | 0                  |
| 0                  | 0                  | 0                  | 0                  |
| 0                  | 0                  | HET                | 0                  |
| 0                  | 0                  | 0                  | 0                  |
| 0                  | 0                  | 0                  | HET                |
| HET                | 0                  | 0                  | HET                |
| 0                  | 0                  | HET                | 0                  |
| HET                | 0                  | 0                  | 0                  |
| 0                  | 0                  | 0                  | 0                  |
| HET                | 0                  | 0                  | 0                  |
| 0                  | 0                  | 0                  | 0                  |
| 0                  | 0                  | 0                  | 0                  |
| 0                  | 0                  | 0                  | 0                  |
| 0                  | 0                  | 0                  | 0                  |
| HET                | 0                  | 0                  | 0                  |
| HET                | 0                  | 0                  | 0                  |
| 0                  | 0                  | 0                  | 0                  |
| HET                | 0                  | 0                  | 0                  |
| 0                  | 0                  | 0                  | 0                  |
| HET                | 0                  | 0                  | 0                  |
| 0                  | 0                  | 0                  | 0                  |
| 0                  | 0                  | 0                  | 0                  |
| HET                | 0                  | 0                  | 0                  |
| HET                | 0                  | 0                  | 0                  |
| HET                | 0                  | 0                  | 0                  |
| HET                | 0                  | HET                | 0                  |
| HET                | 0                  | 0                  | 0                  |
| HET                | 0                  | 0                  | 0                  |
| 0                  | 0                  | 0                  | 0                  |
| 18                 | 1                  | 4                  | 2                  |



B2M  
g[15:44711599\_T>C] SNV per patient

|     |   |
|-----|---|
| 0   | 4 |
| 0   | 2 |
| 0   | 2 |
| 0   | 0 |
| HET | 2 |
| 0   | 0 |
| 0   | 1 |
| 0   | 2 |
| 0   | 1 |
| 0   | 2 |
| 0   | 4 |
| 0   | 2 |
| 0   | 4 |
| 0   | 1 |
| 0   | 1 |
| 0   | 1 |
| 0   | 1 |
| 0   | 0 |
| 0   | 0 |
| 0   | 0 |
| 0   | 1 |
| 0   | 2 |
| 0   | 2 |
| 0   | 2 |
| 0   | 1 |
| 0   | 2 |
| 0   | 1 |
| 0   | 4 |
| 0   | 1 |
| 0   | 2 |
| 0   | 1 |
| 0   | 2 |
| 0   | 2 |
| 0   | 2 |
| 0   | 3 |
| 0   | 3 |
| 0   | 1 |
| 0   | 1 |
| 0   | 0 |
| 1   |   |
